# Supplementary material for: Implementation and Evaluation of an Evidence-Based Group Antenatal Care Program in Two Nigerian States: Design and Baseline Data Collection
Source: Preprints.org preprint supplement (doi:10.20944/preprints202409.1344.v1), 2024-09-18
Supplement: Supplementary file 1 [file supplementary]

**Supplementary Figures**

**Figure S1: ANC Services Received at Most Recent Visit in Kaduna**

**Figure S2: ANC Services Received at Most Recent Visit in Kano**

**Figure S3: ANC Visits by Education Level**
